# Supplementary material
Source: publisher figshare collection journal article supplement (https://gsajournals.figshare.com/articles/dataset/_/11933190)

**A**

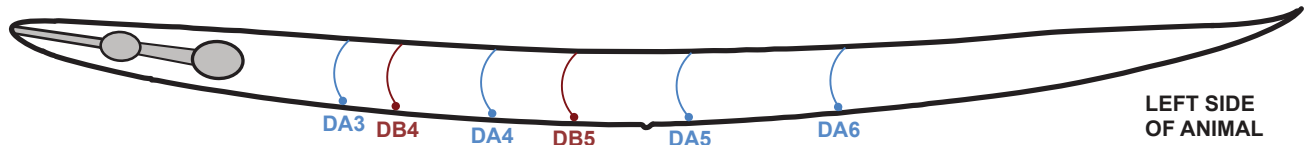

**B**

|                          | DA3   |    | DB4   |    | DA4   |    | DB5   |    | DA5   |    | DA6   |    |
|--------------------------|-------|----|-------|----|-------|----|-------|----|-------|----|-------|----|
|                          | % Def | n  |
| Empty Vector (L4)        | 0     | 24 | 0     | 21 | 0     | 24 | 0     | 20 | 0     | 19 | 0     | 25 |
| <i>unc-44</i> (ANK2)     | 3.2   | 31 | 6.7   | 15 | 7.4   | 27 | 0     | 18 | 8.7   | 23 | 3.3   | 30 |
| <i>ftt-2</i> (YWHAZ)     | 0     | 24 | 0     | 16 | 0     | 23 | 0     | 22 | 0     | 24 | 4.2   | 24 |
| <i>git-1</i> (GIT1)      | 0     | 22 | 0     | 21 | 0     | 23 | 0     | 21 | 0     | 20 | 0     | 22 |
| Empty Vector (L1)        | 0     | 23 | 0     | 20 | 0     | 23 | 0     | 25 | 0     | 23 | 0     | 22 |
| <i>par-5</i> (YWHAZ)     | 0     | 22 | 7.1   | 14 | 0     | 21 | 0     | 23 | 0     | 24 | 0     | 24 |
| <i>let-526</i> (ARID1B)  | 0     | 19 | 0     | 17 | 0     | 19 | 0     | 17 | 0     | 17 | 0     | 18 |
| <i>hsp-1</i> (HSPA8)     | 0     | 14 | 0     | 9  | 0     | 19 | 0     | 26 | 0     | 27 | 0     | 21 |
| <i>daf-21</i> (HSP90AA1) | 0     | 22 | 0     | 15 | 0     | 20 | 0     | 19 | 0     | 19 | 0     | 20 |
| <i>Y51A2D.7</i> (INTS5)  | 0     | 20 | 0     | 13 | 0     | 18 | 0     | 20 | 0     | 18 | 0     | 21 |
| <i>set-16</i> (MLL2)     | 0     | 14 | 0     | 6  | 0     | 17 | 0     | 15 | 0     | 14 | 0     | 15 |
| <i>pop-1</i> (TCF7L2)    | 0     | 21 | 0     | 17 | 0     | 23 | 0     | 22 | 0     | 23 | 0     | 22 |

**C**

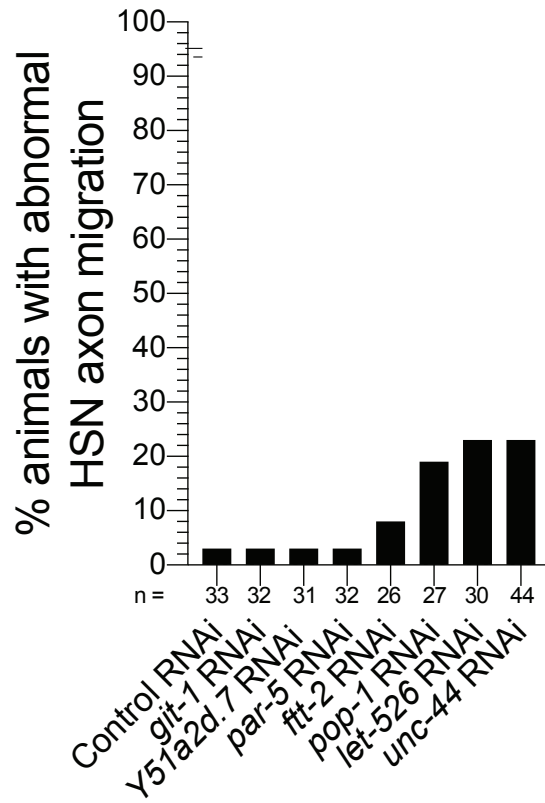

**D**

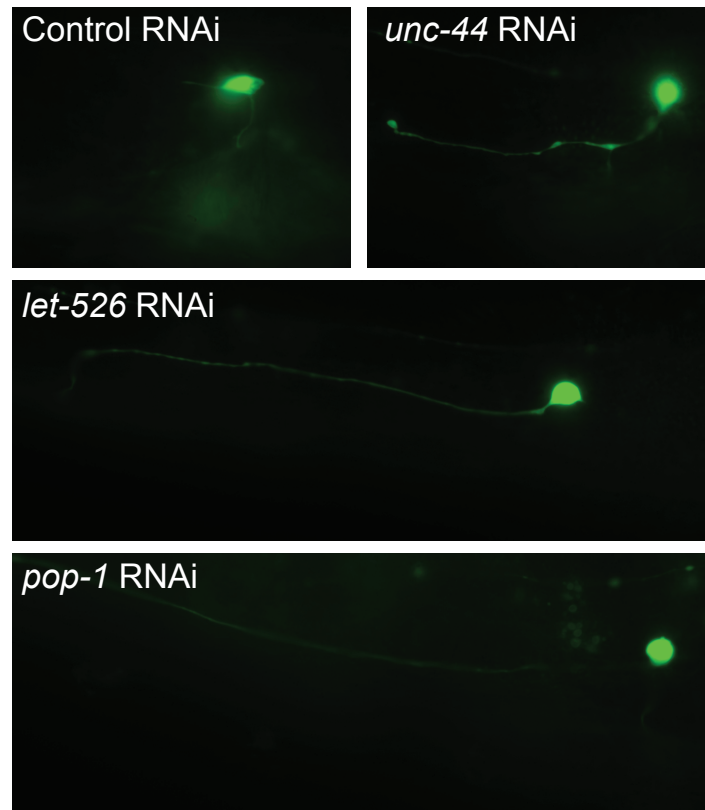

Supplement: Supplementary file 3 [file 1]
