# Supplementary material
Source: publisher figshare collection journal article supplement (https://gsajournals.figshare.com/articles/dataset/_/11933190)
Supplement: Supplementary file 4 [file 1]

| <i>H. sapiens</i><br>Gene | Variant                            | Ensemble<br>Gene | <i>C. elegans</i><br>Locus ID | <i>C. elegans</i><br>Gene | Animals Defective<br>(% ± SD) <sup>*</sup> - NC1687 | n   | Animals Defective<br>(% ± SD) <sup>*</sup> - HML429 | n   |
|---------------------------|------------------------------------|------------------|-------------------------------|---------------------------|-----------------------------------------------------|-----|-----------------------------------------------------|-----|
| <i>HSP90AA1</i>           | SYN-NET <sup>LGD</sup>             | ENSG00000080824  | C47E8.5                       | <i>daf-21</i>             | 72.0 ± 24.4                                         | 25  | Emb                                                 | n/a |
| <i>HSPA8</i>              | SYN-NET <sup>LGD</sup><br>rdNS-SCZ | ENSG00000109971  | F26D10.3                      | <i>hsp-1</i>              | 28.8 ± 14.2                                         | 66  | Emb                                                 | n/a |
| <i>YWHAZ</i>              | SYN-NET <sup>MIS</sup>             | ENSG00000164924  | M117.2                        | <i>par-5</i>              | 15.4 ± 10.5                                         | 26  | 71.0 ± 27.2                                         | 31  |
| <i>YWHAZ</i>              | SYN-NET <sup>MIS</sup>             | ENSG00000164924  | F52D10.3                      | <i>ftt-2</i>              | 3.3 ± 2.4                                           | 60  | 35.2 ± 6.8                                          | 54  |
| <i>GIT1</i>               | SYN-NET <sup>MIS</sup>             | ENSG00000108262  | F14F3.2                       | <i>git-1</i>              | 3.3 ± 2.4                                           | 60  | 32.4 ± 12.1                                         | 37  |
| pPD129.36 empty vector    |                                    |                  |                               |                           | 7.9 ± 6.7                                           | 101 | 0.0 ± 0.0                                           | 20  |

(1) <sup>\*</sup> = % and standard deviation (SD) denote the weighted % and weighted standard deviation, respectively.
