# Supplementary material
Source: publisher figshare collection journal article supplement (https://gsajournals.figshare.com/articles/dataset/_/11933190)
Supplement: Supplementary file 5 [file 1]

| VARIANT CATEGORIES                                                                                                                                                                                                                                                                                                                                                       |                                                                         |               |                                                                                                                                                                                                                                             |                                                                                        |
|--------------------------------------------------------------------------------------------------------------------------------------------------------------------------------------------------------------------------------------------------------------------------------------------------------------------------------------------------------------------------|-------------------------------------------------------------------------|---------------|---------------------------------------------------------------------------------------------------------------------------------------------------------------------------------------------------------------------------------------------|----------------------------------------------------------------------------------------|
| Variant                                                                                                                                                                                                                                                                                                                                                                  | Description                                                             | Patient Class | Gene Selection Criteria                                                                                                                                                                                                                     | Reference                                                                              |
| rLGD                                                                                                                                                                                                                                                                                                                                                                     | <u>r</u> ecurrent <u>L</u> ikely<br><u>G</u> ene <u>D</u> isrupting     | ASD<br>SCZ    | genes harboring loss-of-function mutations, via nonsense, splice-site, or frameshift, that were identified in at least two probands                                                                                                         | Iossifov et al. (4)<br>Fromer et al. (5)<br>Gulsuner et al. (7)<br>McCarthy et al. (8) |
| rdNS                                                                                                                                                                                                                                                                                                                                                                     | <u>r</u> ecurrent <u>d</u> amaging<br><u>N</u> on- <u>S</u> ynonymous   | SCZ           | 1) genes harboring damaging missense* mutations identified in at least two probands, or<br>2) genes harboring an LGD mutation in one proband in combination with a damaging missense mutation identified in at least one additional proband | Guipponi et al. (6)<br>McCarthy et al. (8)                                             |
| RVIS                                                                                                                                                                                                                                                                                                                                                                     | <u>R</u> esidual <u>V</u> ariation<br><u>I</u> ntolerance <u>S</u> core | SCZ           | genes harboring an LGD or broadly damaging missense <sup>†</sup> mutation and whose RVIS scores placed them in the top 15% of genes that have the least common functional genetic variation and are "intolerant"                            | McCarthy et al. (8)                                                                    |
| SYN-NET <sup>LGD</sup>                                                                                                                                                                                                                                                                                                                                                   | <u>S</u> ynaptic <u>N</u> etwork-<br><u>L</u> GD                        | SCZ           | genes harboring non-recurrent LGD mutations that were placed in a synaptic protein interaction network using SynSysNet database                                                                                                             | Fromer et al. (5)<br>Gulsuner et al. (7)                                               |
| SYN-NET <sup>MIS</sup>                                                                                                                                                                                                                                                                                                                                                   | <u>S</u> ynaptic <u>N</u> etwork-<br><u>M</u> issense                   | SCZ           | genes harboring missense <sup>‡</sup> mutations that were placed in a synaptic protein interaction network using SynSysNet database                                                                                                         | Fromer et al. (5)                                                                      |
| (1) * damaging missense: a missense mutation predicted to be damaging by 2 prediction algorithms (SIFT, PolyPhen2). (2) <sup>†</sup> broadly damaging missense: a missense mutation predicted to be damaging by ≥1 prediction algorithm (SIFT, PolyPhen2, LRT, MutationTester). (3) <sup>‡</sup> missense: a mutation which induces a change in the amino acid sequence. |                                                                         |               |                                                                                                                                                                                                                                             |                                                                                        |
