# Supplementary material
Source: publisher figshare collection journal article supplement (https://gsajournals.figshare.com/articles/dataset/_/11933190)
Supplement: Supplementary file 6 [file 1]

| H. sapiens Gene        | Variant                            | Ensemble Gene   | C. elegans Locus ID | C. elegans Gene | Animals Defective (% ± SD) <sup>*</sup> | n   | RNAi Phenotype                                                                                          |
|------------------------|------------------------------------|-----------------|---------------------|-----------------|-----------------------------------------|-----|---------------------------------------------------------------------------------------------------------|
| HSP90AA1               | SYN-NET <sup>LGD</sup>             | ENSG00000080824 | C47E8.5             | daf-21          | 72.0 ± 24.4                             | 25  | hyperbranching of dendrites in hypodermal region <sup>†</sup><br>hyperbranching of quaternary dendrites |
| INTS5                  | RVIS-SCZ                           | ENSG00000185085 | Y51A2D.7            | Y51A2D.7        | 52.5 ± 30.3                             | 40  | hyperbranching of quaternary dendrites                                                                  |
| MLL2                   | RVIS-SCZ                           | ENSG00000167548 | T12D8.1             | set-16          | 33.3 ± 8.5                              | 60  | hypobranching of quaternary dendrites<br>reduced quaternary dendrite extension                          |
| HSPA8                  | rdNS-SCZ<br>SYN-NET <sup>LGD</sup> | ENSG00000109971 | F26D10.3            | hsp-1           | 28.8 ± 14.2                             | 66  | hyperbranching of dendrites in hypodermal region<br>hyperbranching of quaternary dendrites              |
| TRAPPC9                | RVIS-SCZ                           | ENSG00000167632 | C35C5.6             | trpp-9          | 8.3 ± 2.4                               | 60  | none                                                                                                    |
| MYH9                   | rdNS-SCZ<br>SYN-NET <sup>LGD</sup> | ENSG00000100345 | F52B10.1            | nmy-1           | 7.1 ± 3.4                               | 56  | none                                                                                                    |
| SEC31A                 | RVIS-SCZ                           | ENSG00000138674 | T01G1.3             | sec-31          | 5.8 ± 3.0                               | 69  | none                                                                                                    |
| AP3D1                  | rdNS-SCZ                           | ENSG00000065000 | W09G10.4            | apd-3           | 5.5 ± 3.3                               | 73  | none                                                                                                    |
| CHD8                   | RVIS-SCZ<br>rLGD-ASD               | ENSG00000100888 | T04D1.4             | chd-7           | 5.0 ± 3.5                               | 80  | none                                                                                                    |
| PITPNM1                | RVIS-SCZ<br>rdNS-SCZ               | ENSG00000110697 | M01F1.7             | pitp-1          | 5.0 ± 4.1                               | 60  | none                                                                                                    |
| LPHN2                  | rdNS-SCZ                           | ENSG00000117114 | B0286.2             | lat-2           | 4.3 ± 6.8                               | 70  | none                                                                                                    |
| XPNPEP1                | RVIS-SCZ                           | ENSG00000108039 | W03G9.4             | app-1           | 3.8 ± 4.1                               | 80  | none                                                                                                    |
| TAF13                  | rLGD-SCZ                           | ENSG00000197780 | C14A4.10            | taf-13          | 3.3 ± 4.7                               | 60  | none                                                                                                    |
| KIAA1109               | rdNS-SCZ                           | ENSG00000138688 | Y47G6A.23           | lpd-3           | 3.2 ± 5.8                               | 63  | none                                                                                                    |
| PIK3C2B                | rdNS-SCZ                           | ENSG00000133056 | F39B1.1             | piki-1          | 2.7 ± 2.9                               | 75  | none                                                                                                    |
| VPS13D                 | RVIS-SCZ                           | ENSG00000048707 | C25H3.8             | C25H3.8         | 2.5 ± 2.6                               | 79  | none                                                                                                    |
| HUWE1                  | RVIS-SCZ<br>rdNS-SCZ               | ENSG00000086758 | Y67D8C.5            | eel-1           | 2.5 ± 2.5                               | 80  | none                                                                                                    |
| PLEKHH2                | RVIS-SCZ                           | ENSG00000152527 | C34B4.1             | max-1           | 2.5 ± 2.5                               | 80  | none                                                                                                    |
| LAMA2                  | rdNS-SCZ                           | ENSG00000196569 | T22A3.8             | lam-3           | 1.9 ± 3.1                               | 54  | none                                                                                                    |
| DLG2                   | SYN-NET <sup>LGD</sup>             | ENSG00000150672 | C25F6.2             | dlg-1           | 1.7 ± 2.4                               | 60  | none                                                                                                    |
| DPYD                   | rdNS-SCZ                           | ENSG00000188641 | C25F6.3             | dpyd-1          | 1.7 ± 2.4                               | 60  | none                                                                                                    |
| NUP98                  | RVIS-SCZ                           | ENSG00000110713 | ZK328.5             | npp-10          | 1.7 ± 2.4                               | 60  | none                                                                                                    |
| RYR3                   | rdNS-SCZ                           | ENSG00000198838 | K11C4.5             | unc-68          | 0.0 ± 0.0                               | 60  | none                                                                                                    |
| SLC4A8                 | rdNS-SCZ                           | ENSG00000050438 | F52B5.1             | abts-1          | 0.0 ± 0.0                               | 60  | none                                                                                                    |
| AUTS2                  | RVIS-SCZ                           | ENSG00000158321 | no ortholog         | -               |                                         |     |                                                                                                         |
| CACNA1I                | rdNS-SCZ                           | ENSG00000100346 | no ortholog         | -               |                                         |     |                                                                                                         |
| CD14                   | rdNS-SCZ                           | ENSG00000170458 | no ortholog         | -               |                                         |     |                                                                                                         |
| CRYBG3                 | rdNS-SCZ                           | ENSG00000080200 | no ortholog         | -               |                                         |     |                                                                                                         |
| KIF18A                 | rdNS-SCZ                           | ENSG00000121621 | no ortholog         | -               |                                         |     |                                                                                                         |
| LRP5                   | RVIS-SCZ                           | ENSG00000162337 | no ortholog         | -               |                                         |     |                                                                                                         |
| MECP2                  | RVIS-SCZ                           | ENSG00000169057 | no ortholog         | -               |                                         |     |                                                                                                         |
| MKI67                  | rLGD-SCZ                           | ENSG00000148773 | no ortholog         | -               |                                         |     |                                                                                                         |
| MKL2                   | RVIS-SCZ                           | ENSG00000186260 | no ortholog         | -               |                                         |     |                                                                                                         |
| NCKIPSD                | SYN-NET <sup>LGD</sup>             | ENSG00000213672 | no ortholog         | -               |                                         |     |                                                                                                         |
| NEB                    | rdNS-SCZ                           | ENSG00000183091 | no ortholog         | -               |                                         |     |                                                                                                         |
| NIPAL3                 | rdNS-SCZ                           | ENSG00000001461 | no ortholog         | -               |                                         |     |                                                                                                         |
| NLRC5                  | rdNS-SCZ                           | ENSG00000140853 | no ortholog         | -               |                                         |     |                                                                                                         |
| RBP3                   | RVIS-SCZ                           | ENSG00000265203 | no ortholog         | -               |                                         |     |                                                                                                         |
| RGS12                  | rdNS-SCZ                           | ENSG00000159788 | no ortholog         | -               |                                         |     |                                                                                                         |
| STAC2                  | rdNS-SCZ                           | ENSG00000141750 | no ortholog         | -               |                                         |     |                                                                                                         |
| pPD129.36 empty vector |                                    |                 |                     |                 | 7.9 ± 6.7                               | 101 | none                                                                                                    |

(1) \* = % and standard deviation (SD) denote the weighted % and weighted standard deviation, respectively. (2) † = "hyperbranching in hypodermal region" may include an increase in secondary and/or ectopic tertiary dendrites as well as a misguidance of quaternary dendrites into the hypodermal region.
