# Supplementary material
Source: publisher figshare collection journal article supplement (https://gsajournals.figshare.com/articles/dataset/_/11933190)
Supplement: Supplementary file 7 [file 1]

| <i>H. sapiens</i> Gene | Variant              | Ensemble Gene   | <i>C. elegans</i> Locus ID | <i>C. elegans</i> Gene | Animals Defective (% ± SD) <sup>(1)</sup> | n   | RNAi Phenotype                                                                                                                                     |
|------------------------|----------------------|-----------------|----------------------------|------------------------|-------------------------------------------|-----|----------------------------------------------------------------------------------------------------------------------------------------------------|
| ARID1B                 | rLGD-ASD             | ENSG00000049618 | C01G8.9                    | let-526                | 40.4 ± 20.1                               | 47  | hyperbranching of dendrites in hypodermal region <sup>(2)</sup><br>hypobranched of quaternary dendrites<br>disorganization of arborization pattern |
| ANK2 <sup>(3)</sup>    | rLGD-ASD             | ENSG00000145362 | B0350.2                    | unc-44                 | 20.0 ± 12.0                               | 115 | hypobranched of quaternary dendrites                                                                                                               |
| TCF7L2                 | rLGD-ASD             | ENSG00000148737 | W10C8.2                    | pop-1                  | 13.0 ± 9.2                                | 54  | multiple PVD-like cell bodies                                                                                                                      |
| TBR1                   | rLGD-ASD             | ENSG00000136535 | F40H6.4                    | tbx-11                 | 10.0 ± 4.1                                | 60  | none                                                                                                                                               |
| WDFY3                  | rLGD-ASD             | ENSG00000163625 | C26H9A.2                   | wdfy-3                 | 9.9 ± 5.7                                 | 91  | none                                                                                                                                               |
| NCKAP1                 | rLGD-ASD             | ENSG00000061676 | F28D1.10                   | gex-3                  | 9.0 ± 4.3                                 | 78  | none                                                                                                                                               |
| RIMS1                  | rLGD-ASD             | ENSG00000079841 | T10A3.1                    | unc-10                 | 8.8 ± 12.4                                | 80  | none                                                                                                                                               |
| CHD2                   | rLGD-ASD             | ENSG00000173575 | H06O01.2                   | chd-1                  | 7.5 ± 7.5                                 | 80  | none                                                                                                                                               |
| GIGYF1                 | rLGD-ASD             | ENSG00000146830 | C18H9.3                    | C18H9.3                | 7.3 ± 3.7                                 | 55  | none                                                                                                                                               |
| DSCAM                  | rLGD-ASD             | ENSG00000171587 | F39H12.4                   | igcm-1                 | 6.3 ± 2.2                                 | 80  | none                                                                                                                                               |
| CHD8                   | rLGD-ASD<br>RVIS-SCZ | ENSG00000100888 | T04D1.4                    | chd-7                  | 5.0 ± 3.5                                 | 80  | none                                                                                                                                               |
| KDM5B                  | rLGD-ASD             | ENSG00000117139 | ZK593.4                    | rbr-2                  | 5.0 ± 3.5                                 | 80  | none                                                                                                                                               |
| DIP2A                  | rLGD-ASD             | ENSG00000160305 | F28B3.4                    | dip-2                  | 4.9 ± 3.5                                 | 81  | none                                                                                                                                               |
| PHF2                   | rLGD-ASD             | ENSG00000197724 | F29B9.2                    | jmjd-1.2               | 4.8 ± 4.1                                 | 63  | none                                                                                                                                               |
| KMT2E                  | rLGD-ASD             | ENSG00000005483 | Y51H4A.12                  | set-26                 | 3.8 ± 2.2                                 | 53  | none                                                                                                                                               |
| KDM6B                  | rLGD-ASD             | ENSG00000132510 | D2021.1                    | utx-1                  | 3.3 ± 2.4                                 | 60  | none                                                                                                                                               |
| MED13L                 | rLGD-ASD             | ENSG00000123066 | K08F8.6                    | let-19                 | 2.6 ± 2.5                                 | 76  | none                                                                                                                                               |
| PHF2                   | rLGD-ASD             | ENSG00000197724 | F43G6.6                    | jmjd-1.1               | 1.7 ± 2.4                                 | 58  | none                                                                                                                                               |
| DYRK1A                 | rLGD-ASD             | ENSG00000157540 | T04C10.1                   | mbk-1                  | 1.3 ± 2.5                                 | 76  | none                                                                                                                                               |
| KMT2E                  | rLGD-ASD             | ENSG00000005483 | F15E6.1                    | set-9                  | 0.0 ± 0.0                                 | 58  | none                                                                                                                                               |
| ADNP                   | rLGD-ASD             | ENSG00000101126 | no ortholog                | -                      |                                           |     |                                                                                                                                                    |
| ANKRD11                | rLGD-ASD             | ENSG00000167522 | no ortholog                | -                      |                                           |     |                                                                                                                                                    |
| FOXP1                  | rLGD-ASD             | ENSG00000114861 | no ortholog                | -                      |                                           |     |                                                                                                                                                    |
| GRIN2B                 | rLGD-ASD             | ENSG00000273079 | no ortholog                | -                      |                                           |     |                                                                                                                                                    |
| KATNAL2                | rLGD-ASD             | ENSG00000167216 | no ortholog                | -                      |                                           |     |                                                                                                                                                    |
| POGZ                   | rLGD-ASD             | ENSG00000143442 | no ortholog                | -                      |                                           |     |                                                                                                                                                    |
| SCN2A                  | rLGD-ASD             | ENSG00000136531 | no ortholog                | -                      |                                           |     |                                                                                                                                                    |
| TNRC6B                 | rLGD-ASD             | ENSG00000100354 | no ortholog                | -                      |                                           |     |                                                                                                                                                    |
| WAC                    | rLGD-ASD             | ENSG00000095787 | no ortholog                | -                      |                                           |     |                                                                                                                                                    |
| pPD129.36 empty vector |                      |                 |                            |                        | 7.9 ± 6.7                                 | 101 | none                                                                                                                                               |

(1) \* = % and standard deviation (SD) denote the weighted % and weighted standard deviation, respectively. (2) † = "hyperbranching in hypodermal region" may include an increase in secondary and/or ectopic tertiary dendrites as well as a misguidance of quaternary dendrites into the hypodermal region. (3) ‡ = ANK2 RNAi data as previously reported in Aguirre-Chen et al., 2011.
