# Supplementary material
Source: publisher figshare collection journal article supplement (https://gsajournals.figshare.com/articles/dataset/_/11933190)

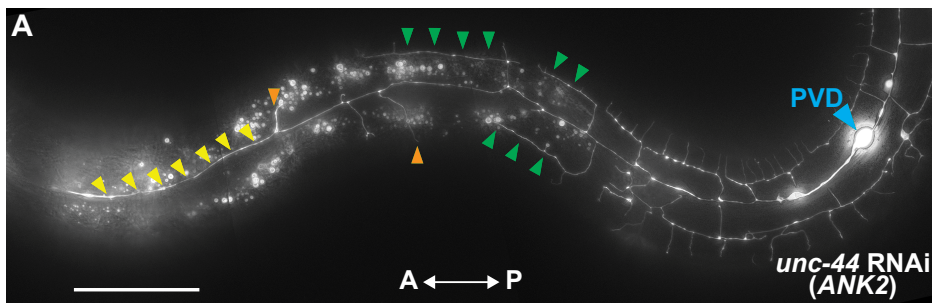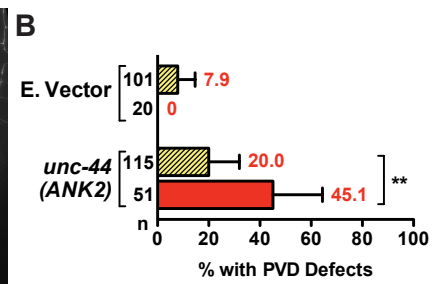

Supplement: Supplementary file 1 [file 1]

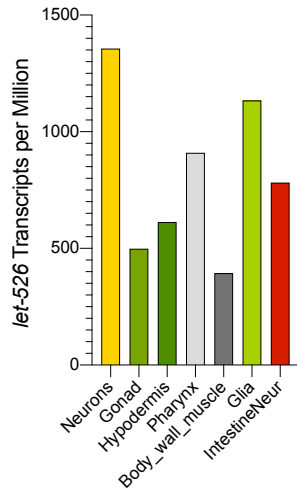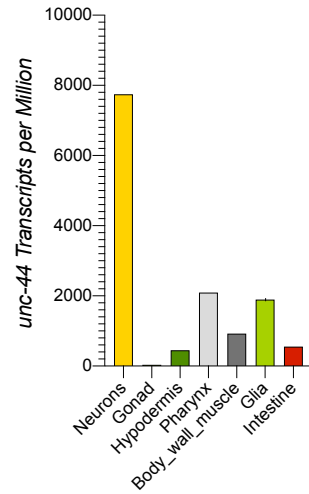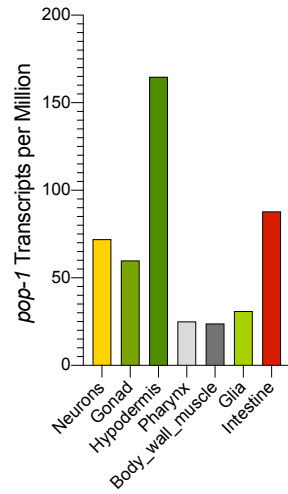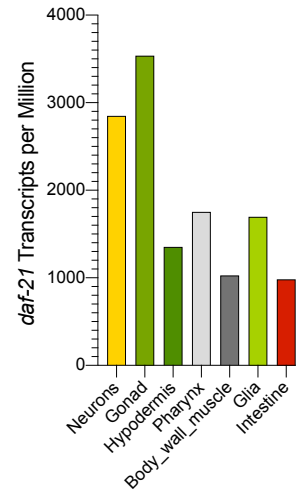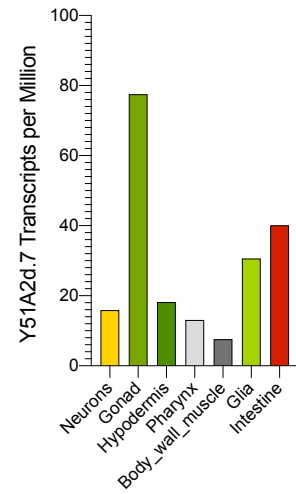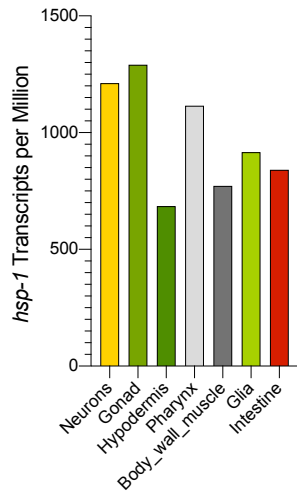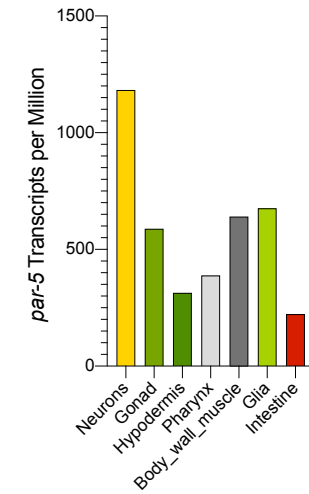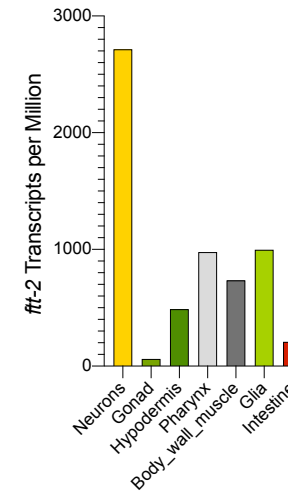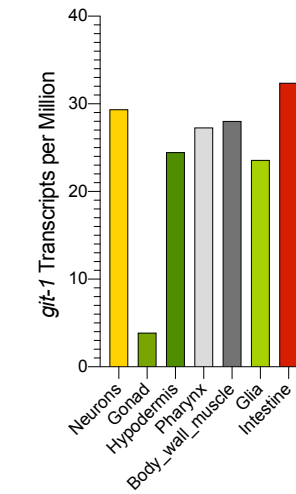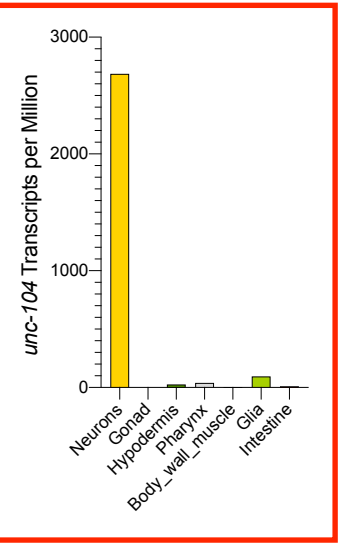

Neuron-specific

Supplement: Supplementary file 2 [file 1]
